# Supplementary material
Source: PubMed Central journal article supplement (PMC4259010)
Supplement: NIHMS60105-supplement-3.pdf [file NIHMS60105-supplement-3.pdf]

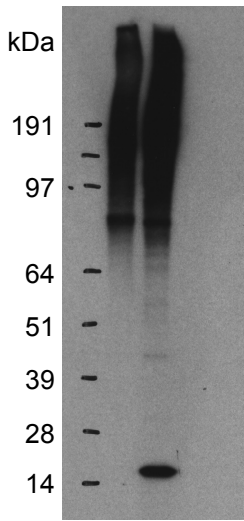

Corresponding to Fig. 1A  
(1st column)

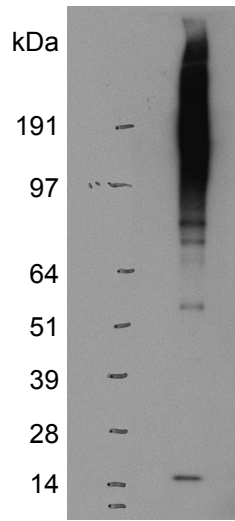

Corresponding to Fig. 1A  
(2nd column)

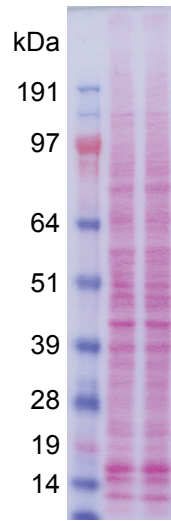

Corresponding to Fig. 1A  
(3rd column)

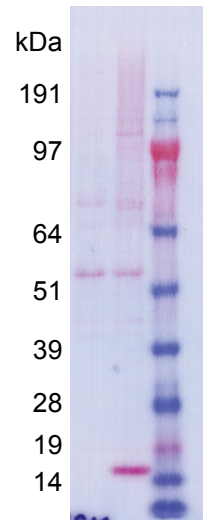

Corresponding to Fig. 1A  
(4th column)

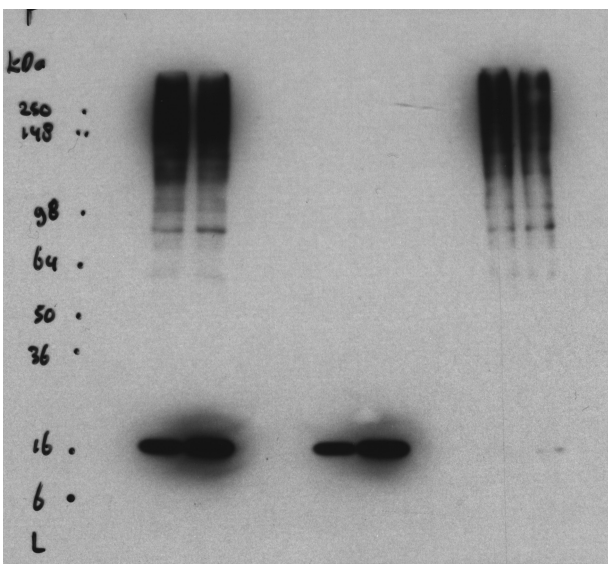

Corresponding to Fig. 1E  
(left panel)

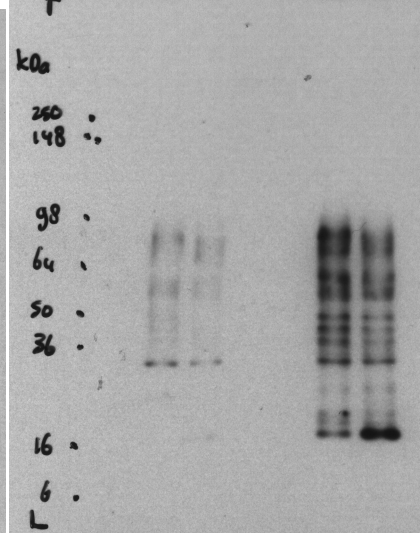

Corresponding to Fig. 1E  
(right panel, short exposure)

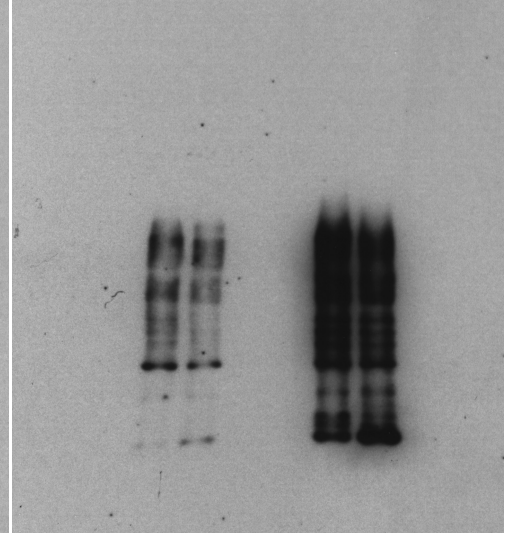

Corresponding to Fig. 1E  
(right panel, longer exposure)

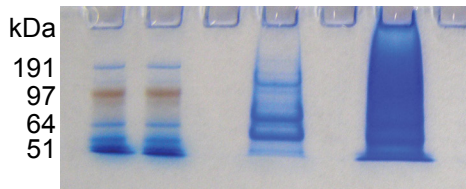

Corresponding to Fig. 1C

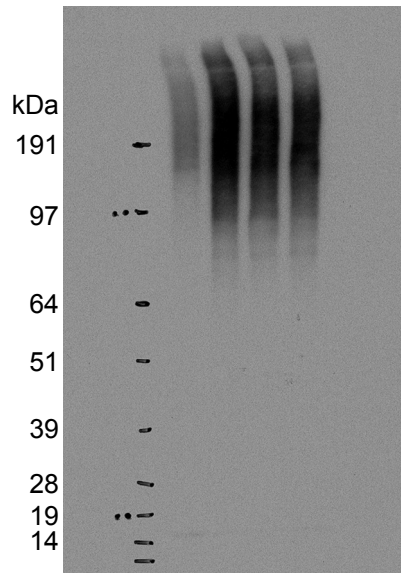

Corresponding to Fig. 1F  
(left panel)

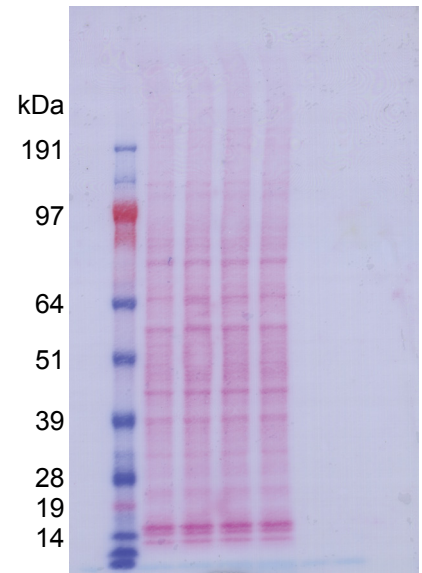

Corresponding to Fig. 1F  
(right panel)

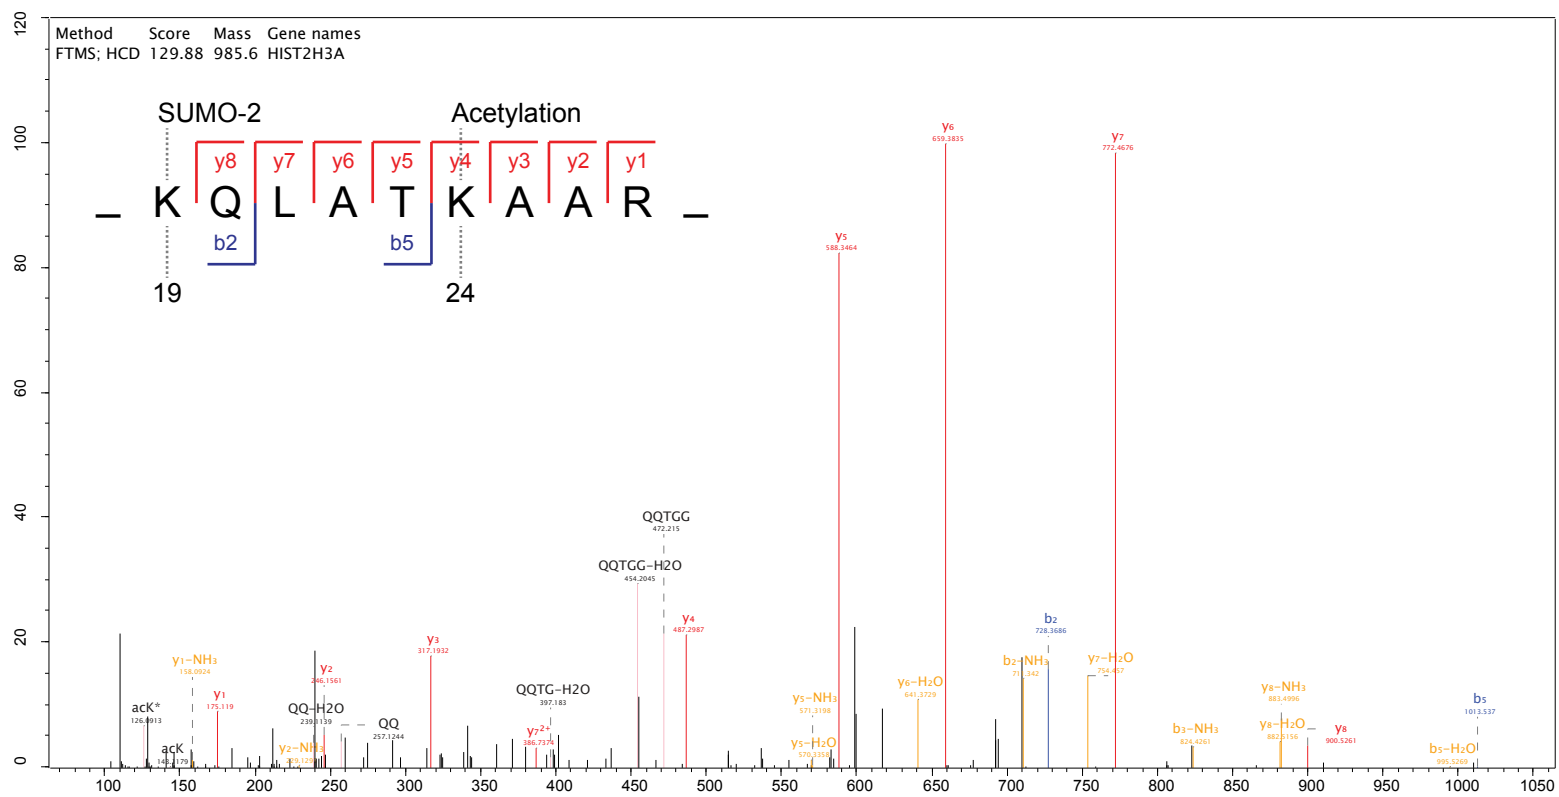

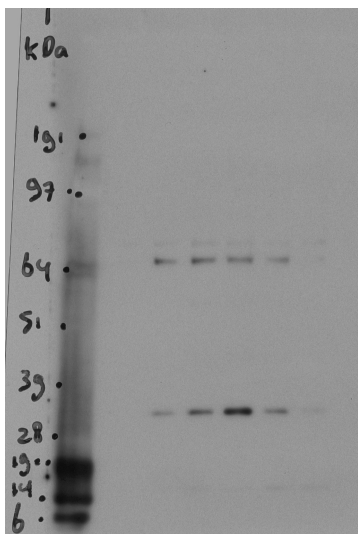

Corresponding to Fig. 3F  
(1st row, left column)

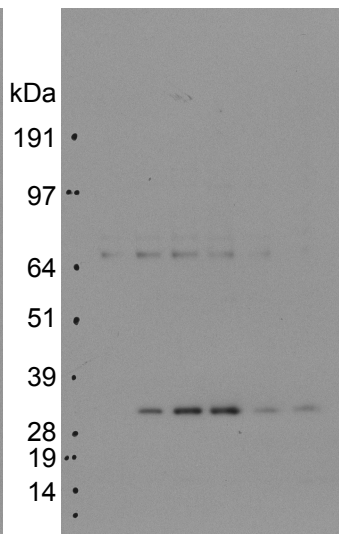

Corresponding to Fig. 3F  
(1st row, right column)

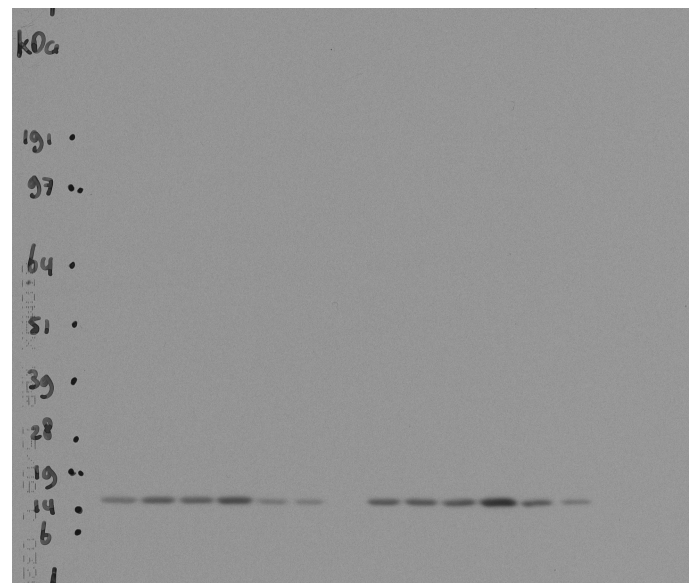

Corresponding to Fig. 3F  
(2nd row, both columns)

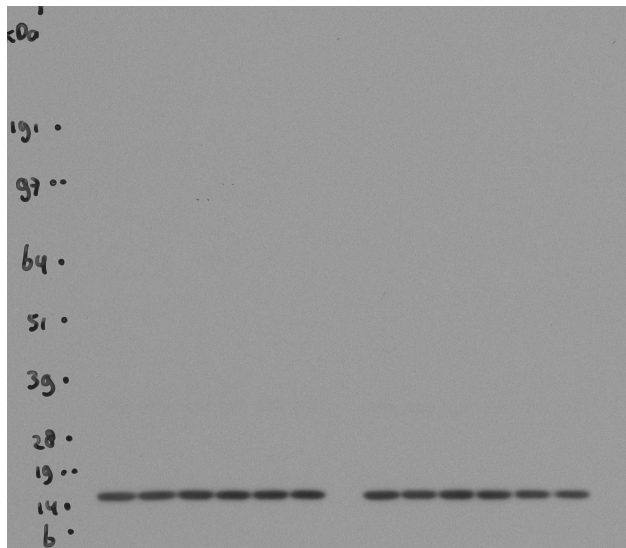

Corresponding to Fig. 3F  
(3rd row, both columns)

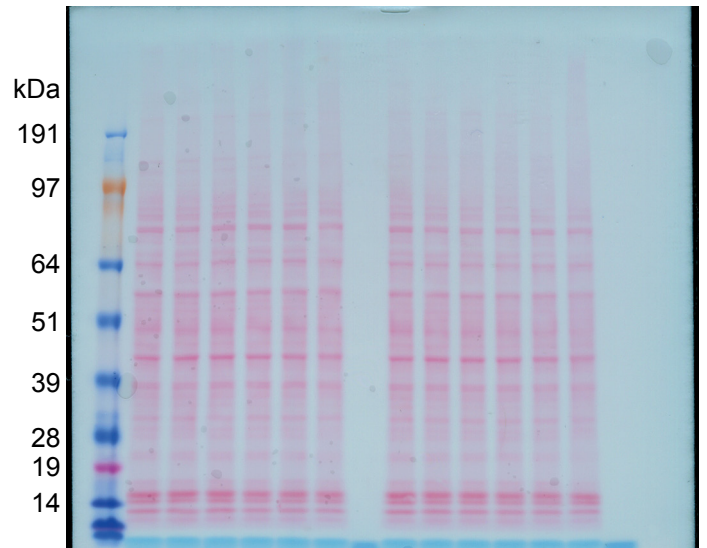

Corresponding to Fig. 3F  
(4th row, both columns)

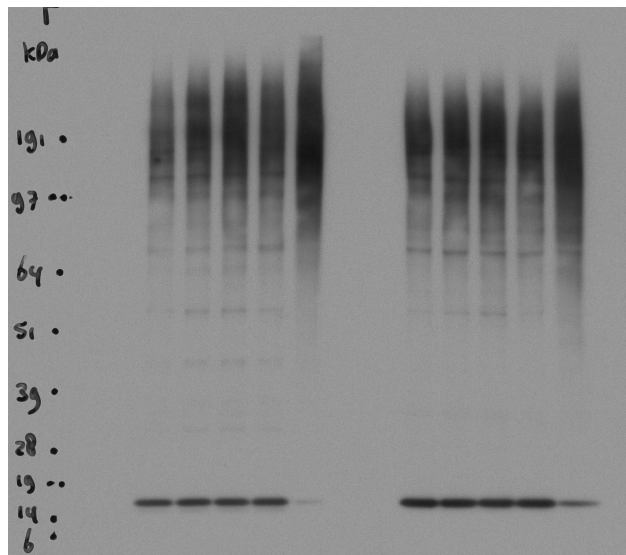

Corresponding to Fig. 3F  
(5th row, both columns)



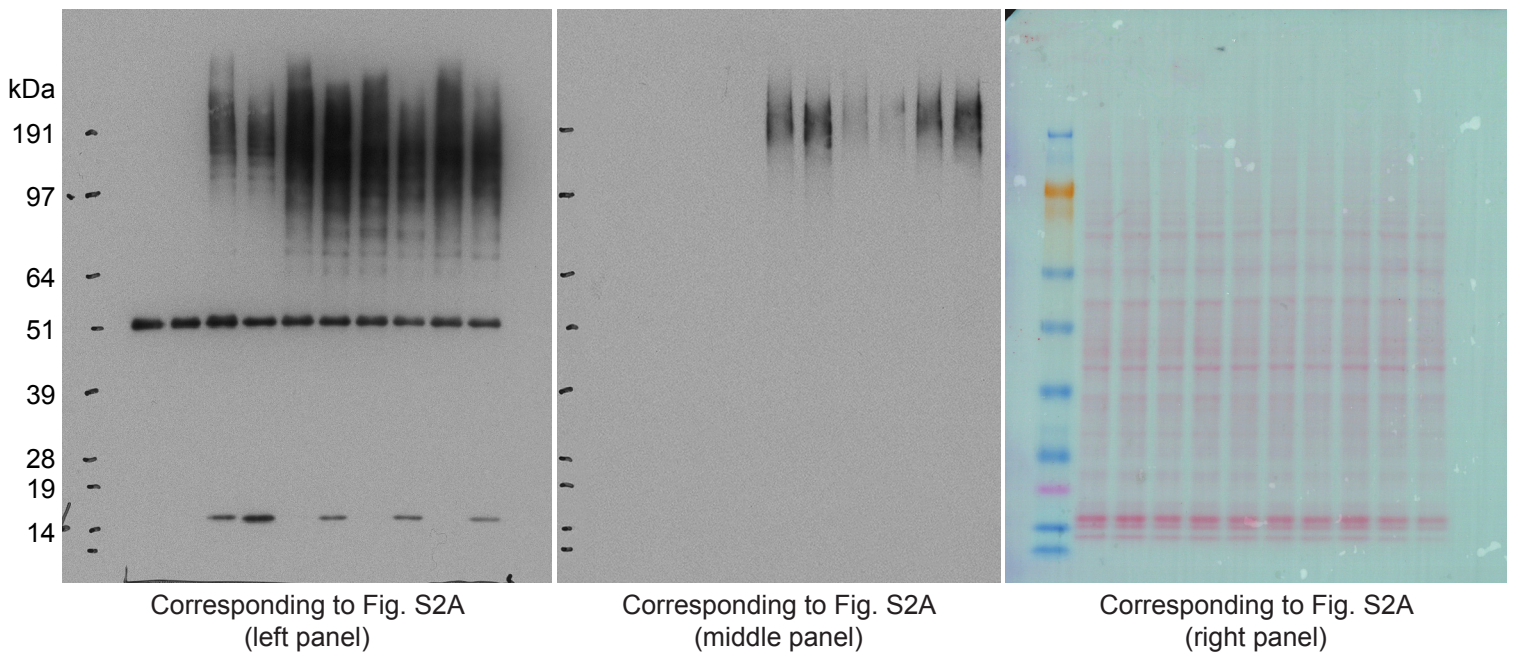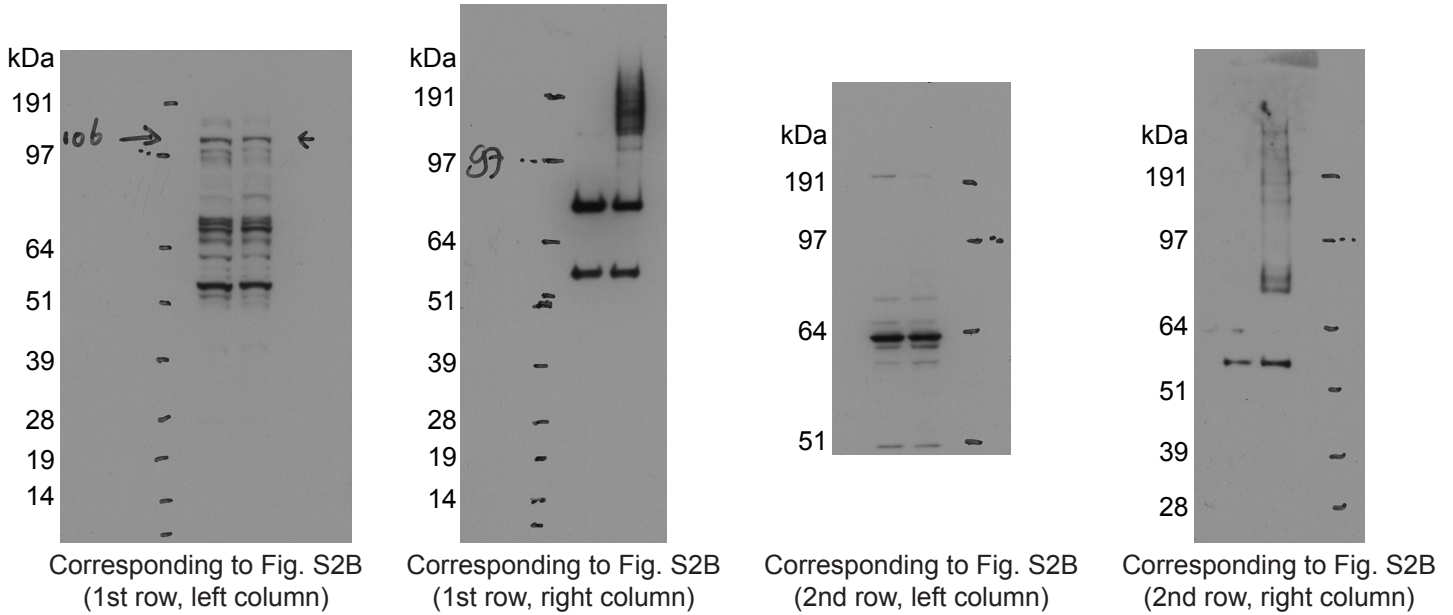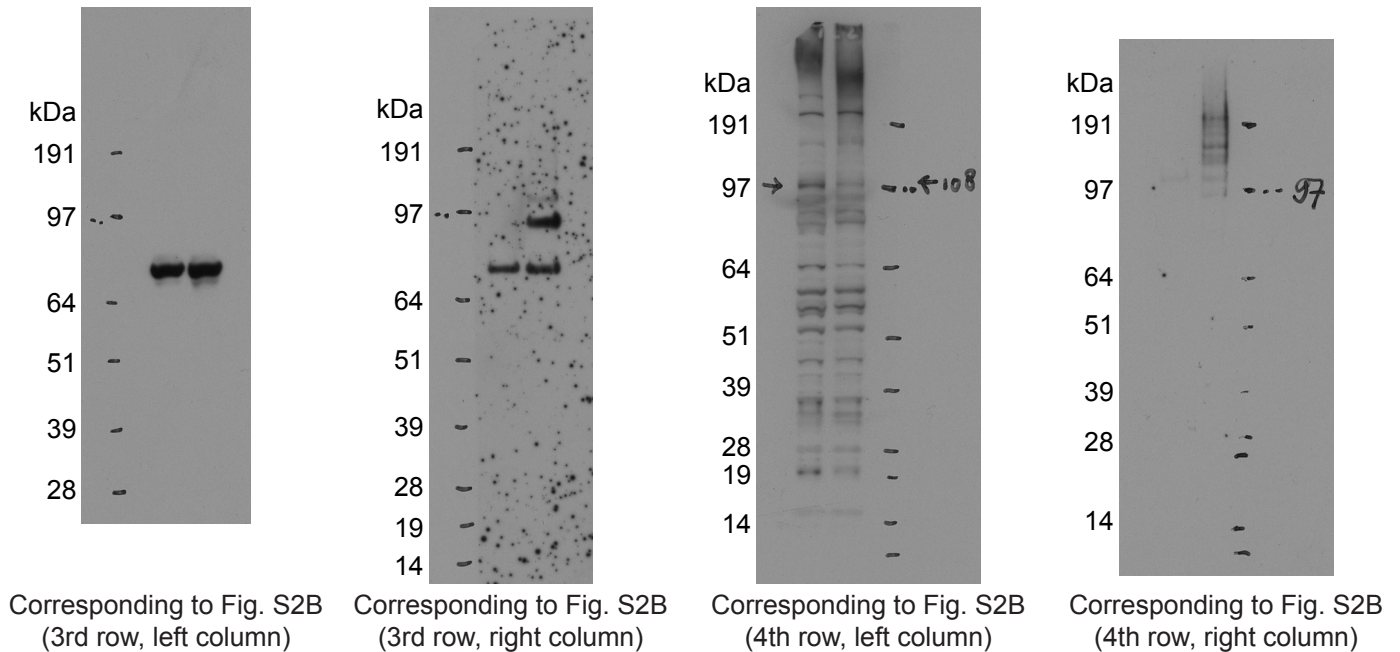



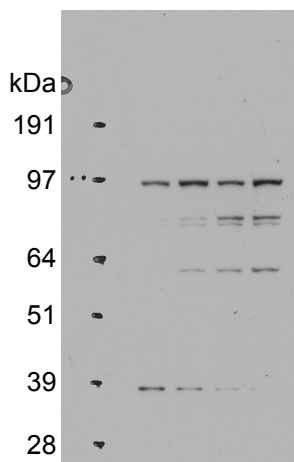

Corresponding to Fig. S2C  
(1st row, left column)

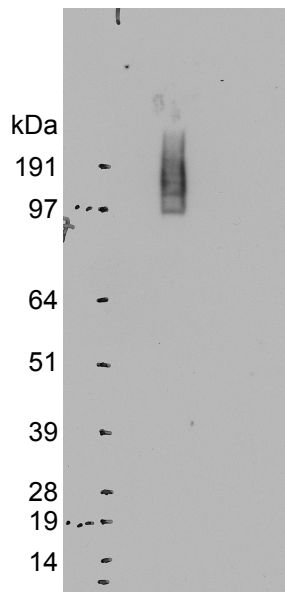

Corresponding to Fig. S2C  
(1st row, right column)

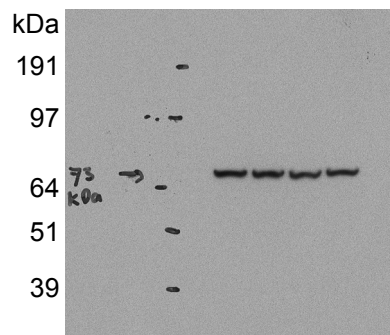

Corresponding to Fig. S2C  
(2nd row, left column)

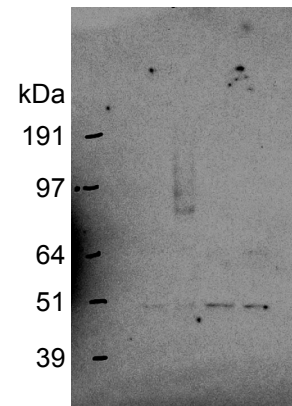

Corresponding to Fig. S2C  
(2nd row, right column)

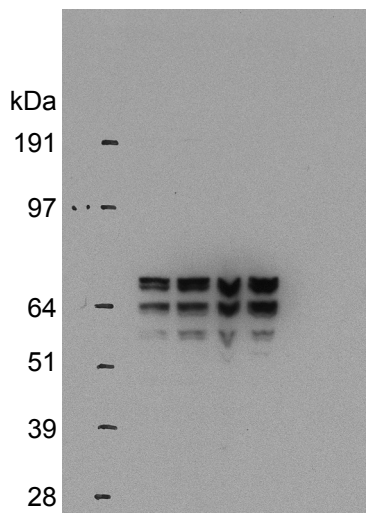

Corresponding to Fig. S2C  
(3rd row, left column)

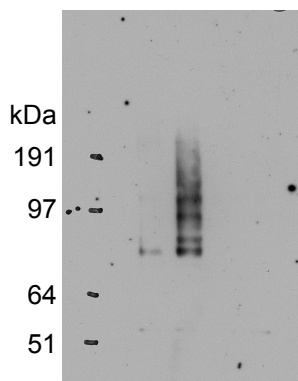

Corresponding to Fig. S2C  
(3rd row, right column)

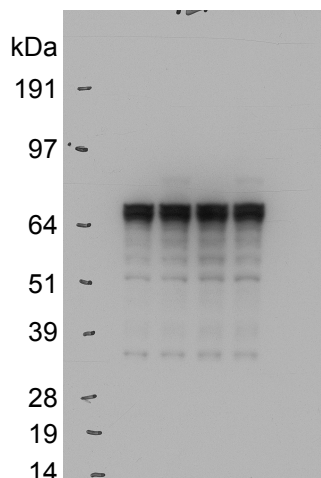

Corresponding to Fig. S2C  
(4th row, left column)

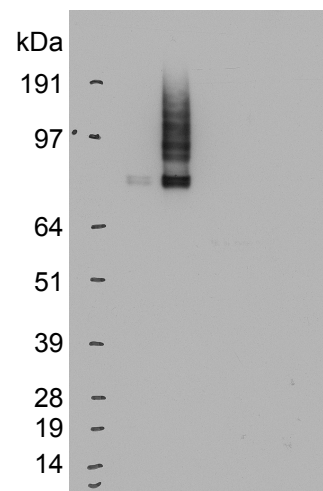

Corresponding to Fig. S2C  
(4th row, right column)

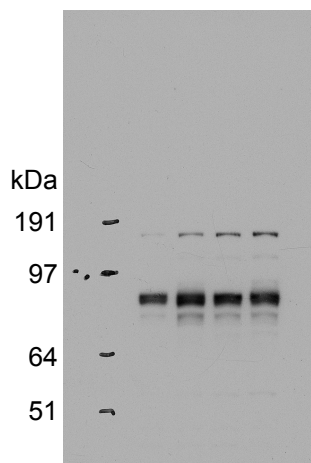

Corresponding to Fig. S2C  
(5th row, left column)

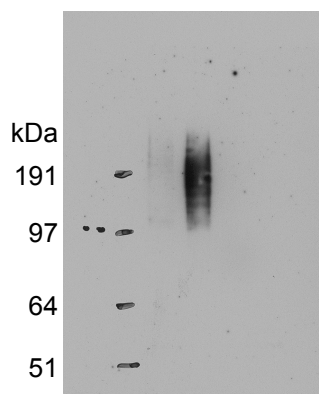

Corresponding to Fig. S2C  
(5th row, right column)

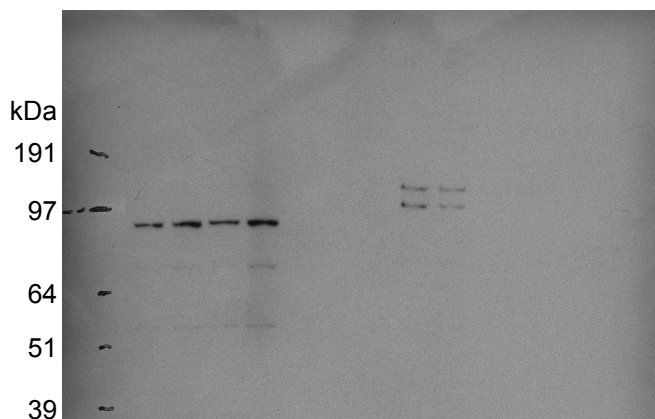

Corresponding to Fig. S2C  
(6th row, both columns)

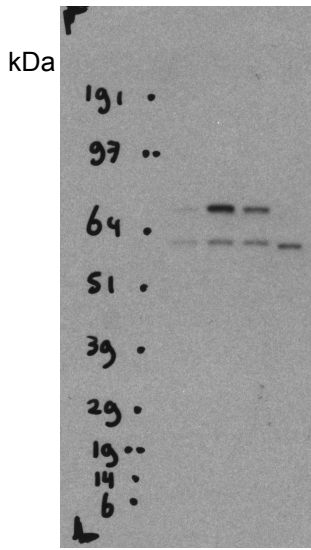

Corresponding to Fig. S5A

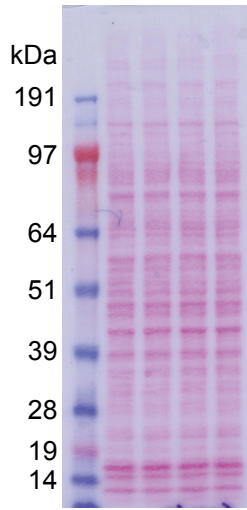

Corresponding to Fig. S5A

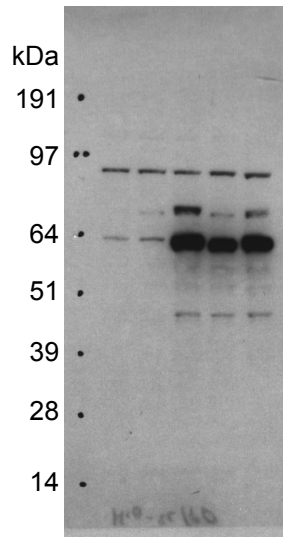

Corresponding to Fig. S5B

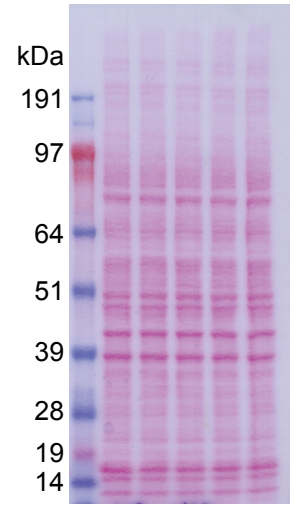

Corresponding to Fig. S5B

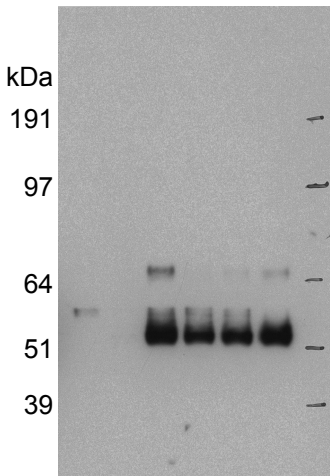

Corresponding to Fig. S5C  
(left panel)

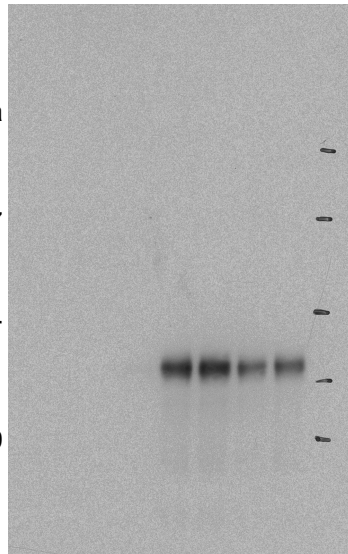

Corresponding to Fig. S5D  
(left panel)

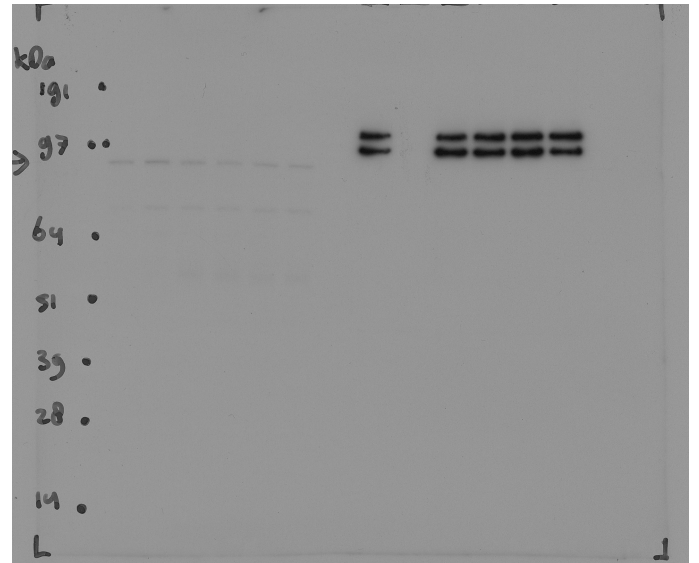

Corresponding to Fig. S5D  
(center panel)

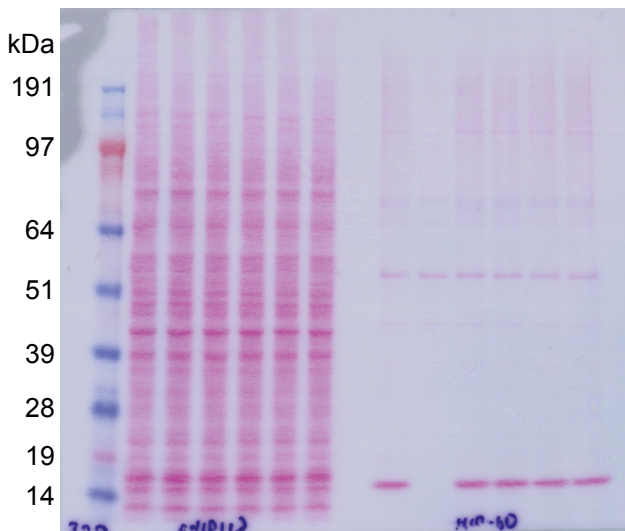

Corresponding to Fig. S5D  
(right panel)

Corresponding to Fig. S5C  
(right panel)
